# Supplementary material
Source: HighWire-hosted journal article supplement (doi:10.1101/rna.080384.125)
Supplement: Supplemental_Legends.docx [file Supplemental_Legends.docx]

**Figure S1: CSDE1 does not affect the stability of TMBIM6 protein but correlates in expression among melanoma cells.**

**(A)** Western blotting of protein extracts from SK-Mel-147 cells transfected with CSDE1 siRNA and treated with MG132 at 10µM for 4 hours. The samples were run on SDS-PAGE, and TMBIM6, CSDE1, and CDK6 proteins were probed. β-actin served as a loading control. **(B)** (Left) Western blotting of lysates from different melanoma cells (Metastatic: SK-Mel-147, SK-Mel-94, UACC-62, M14, 451 LU, 1205-LU; Non-metastatic: WM-164, WM-793) and non-tumoral melanocytes. The proteins indicated were probed using respective antibodies. Vinculin was used as a loading control. (Right)Line graph showing the correlation between the expression of TMBIM6 and CSDE1. The band intensities were measured using Fiji and normalized to vinculin (AU: Arbitrary Units).

**Figure S2: The miRNA pathway negatively regulates the expression of TMBIM6 in the melanoma cell line UACC-62.**

**(A)** TMBIM6 expression analysis by western blotting using the lysate from UACC-62 cells under control and Dicer knockdown conditions. **(B)** Detection of TMBIM6 by western blotting in lysates prepared from UACC-62 cells under control and AGO2 knockdown conditions. **(C)** Western blots showing the expression of TMBIM6 in lysates prepared from UACC-62 cells transfected with antagomiRs of the negative miRNA control or miR-20a-5p. **(D)** TMBIM6 expression analysis by western blotting from UACC-62 cell lysate transfected with mimics of the negative miRNA control or miR-20a-5p. β-actin acts as the loading control.

**Figure S3:** Relative luciferase levels (renilla/firefly) from the lysate of HEK293T cells co-transfected with miRNA antagomiRs and the TMBIM6 3’UTR reporter constructs. Data are presented as mean ± SD (*, p<0.05; **, p<0.03; n=3; two tailed t-test).

**Figure S4: miR-19a-3p-mediated regulation of TMBIM6 is not associated with CSDE1.**

**(A)** Schematic representation of TMBIM6 3’UTR. **(B-C)** Relative TMBIM6 mRNA levels in total RNA **(B)** and those that are bound by CSDE1 **(C)** in SK-Mel-147 cells transfected with the negative miRNA control or miR-19a-3p antagomiRs. **(D)** Western blot confirming the efficiency of CSDE1 immunoprecipitation from cells transfected with the negative miRNA control or miR-19a-3p antagomiRs. **(E)** Western blot analysis of TMBIM6 expression from SK-Mel-147 cell lysate transfected with miRNA mimics and co-transfected with FLAG-CSDE1. Data in (B-C) are presented as mean ± SD (n.s., non-significant, p>0.05; n=3; two-tailed t-test). The mRNA levels were quantified using dye-based RT-qPCR. β-actin served as a loading control and the reference gene for western blotting and dye-based RT-qPCR, respectively.

**Figure S5: CSDE1 depletion does not alter the expression levels of miRNAs from the miR-17-92 cluster in melanoma cells.**

Relative levels of candidate miRNAs from the miR-17-92 cluster, in total RNA, from control and CSDE1-depleted SK-Mel-147 cells. Data are presented as mean ± SD (n.s., non-significant, p>0.05; n=3; two-tailed t-test). The miRNA levels were quantified using TaqMan miRNA assays. U6snRNA was used as a reference gene.
